# Supplementary material for: NINJ1 induces plasma membrane rupture and release of damage-associated molecular pattern molecules during ferroptosis
Source: PubMed Central journal article supplement (PMC10987646; doi:10.1038/s44318-024-00055-y), 2024-02-23
Supplement: 44318_2024_55_MOESM11_ESM.pdf [file 44318_2024_55_MOESM11_ESM.pdf]

## Expanded View Figures

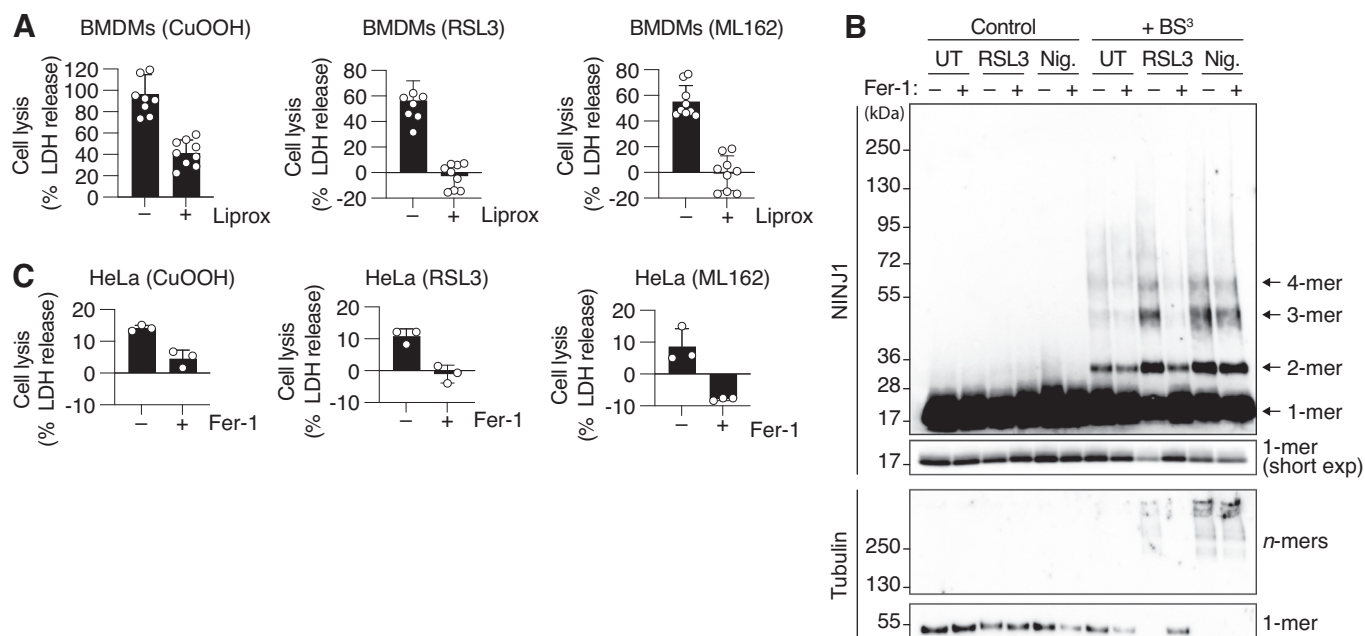

**Figure EV1. Ferroptosis inhibitors specifically block ferroptosis in BMDMs.**

(A) LDH release in WT BMDMs treatment with 1 mM CuOOH for 5 h, 5  $\mu$ M RSL3 for 6 h, or 5  $\mu$ M ML162 for 5 h. When indicated, 1  $\mu$ M Liprox was added simultaneously with CuOOH, RSL3, or ML162. Liprox = Liproxstatin-1. (B) Western blot analysis of endogenous NINJ1 in WT BMDMs treated with 5  $\mu$ g/mL nigericin for 1.5 h or 5  $\mu$ M RSL3 for 4 h followed by treatment with the membrane-impermeable crosslinker BS<sup>3</sup>. Mixed supernatant and cell extracts were analyzed. FL, full length; Short exp = short exposure; 1-mer = monomer; 2-mer = dimer; 3-mer = trimer; 4-mer = tetramer and *n*-mer, higher-order oligomers. (C) LDH release in HeLa cells after treatment with 1 mM CuOOH for 3 h, 5  $\mu$ M RSL3 for 3 h, or 5  $\mu$ M ML162 for 3 h. When indicated, 25  $\mu$ M Fer-1 was added simultaneously with ferroptosis and pyroptosis activators (B, C). Data information: All graphs show the mean  $\pm$  SD. Data are pooled from three independent experiments (A) or representative of two (B, C) independent experiments performed in triplicate.

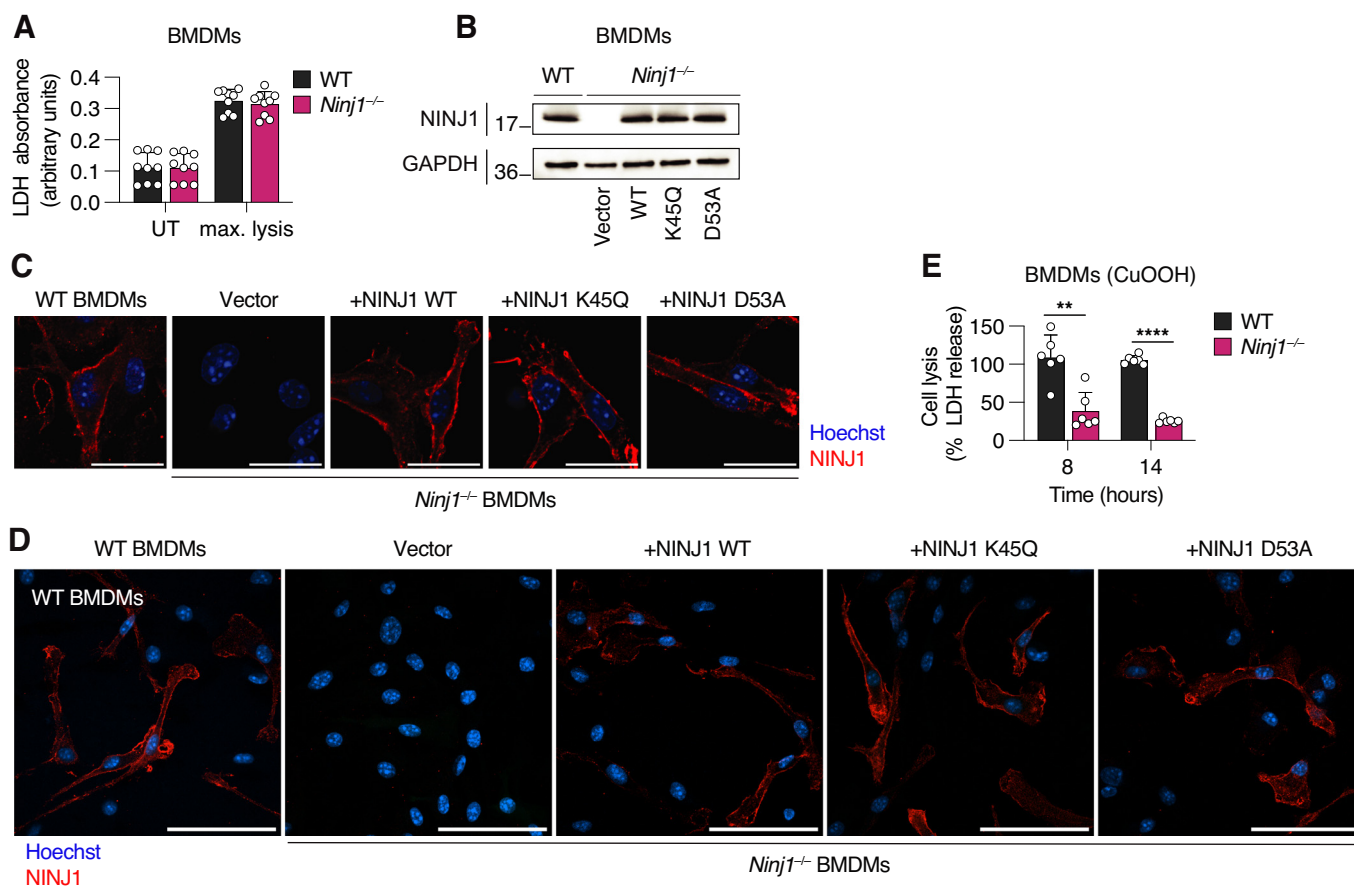

**Figure EV2. NINJ1 filament formation is essential to induce cell lysis in ferroptosis.**

(A) LDH absorbance in WT and *Ninj1*<sup>-/-</sup> BMDMs untreated (UT) or lysed with Triton X-100 to a final concentration of 0.01% (max. lysis). (B) Western blot of NINJ1 expression in WT or *Ninj1*<sup>-/-</sup> BMDMs transduced with a retroviral vector expressing WT mNINJ1 or different mNINJ1 mutants. Transduction with a GFP expressing vector was used as a control. Cell extracts were analyzed. GAPDH is a loading control. (C, D) Immunofluorescence confocal microscopy of NINJ1 (red) in WT or *Ninj1*<sup>-/-</sup> BMDMs complemented with WT or different NINJ1 mutants upon retroviral transduction. Scale bars: 20  $\mu$ m (C) and 60  $\mu$ m (D). (E) LDH release in WT and *Ninj1*<sup>-/-</sup> BMDMs upon treatment with 1 mM CuOOH for 8 or 14 h. Data information: All graphs show the mean  $\pm$  SD. Data are pooled from three independent experiments performed in triplicate (A, E) or representative of two different experiments (B, C, D). Statistical analysis was done using Student's unpaired two-sided t-test. \*\*\*\*  $P < 0.0001$ , \*\*  $P < 0.01$ .

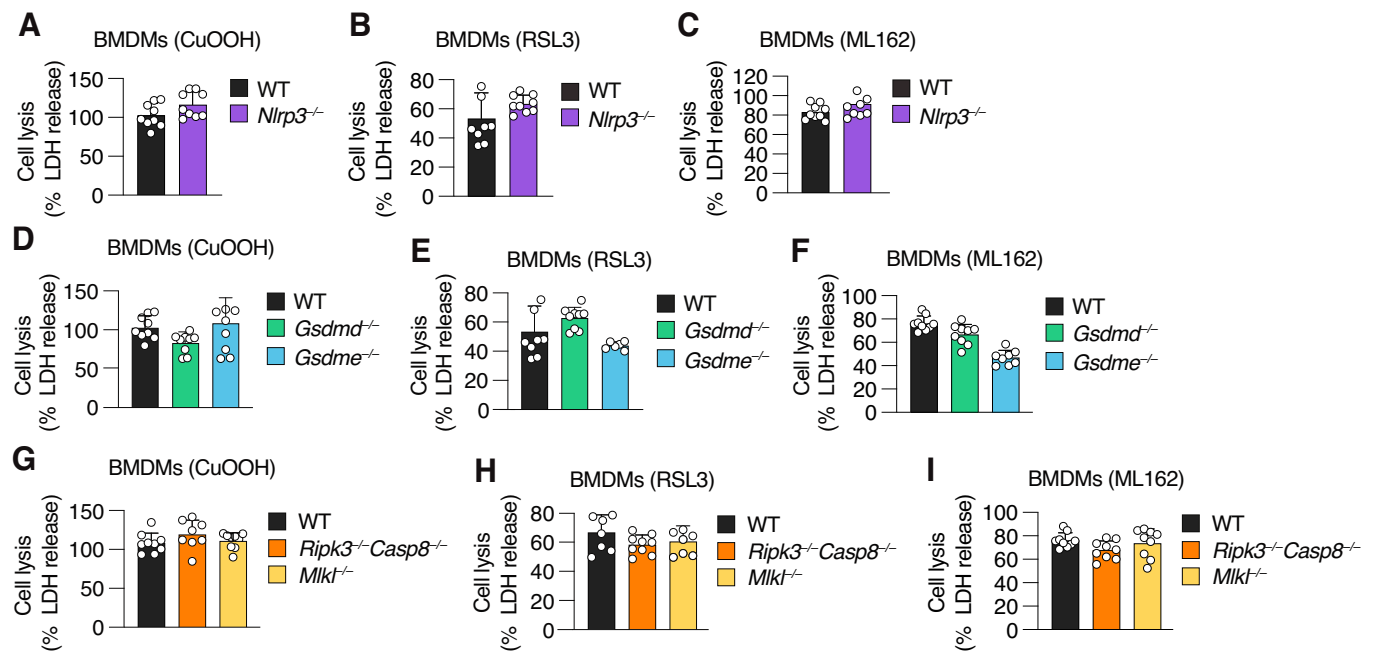

**Figure EV3. NIN1 is the only driver of cell lysis during ferroptosis.**

(A–I) LDH release in WT and *Nlrp3*<sup>-/-</sup> BMDMs treated with 1 mM CuOOH for 5 h (A), 5  $\mu$ M RSL3 for 6 h (B), or 5  $\mu$ M ML162 for 5 h (C), WT, *Gsdmd*<sup>-/-</sup>, and *Gsdme*<sup>-/-</sup> BMDMs treated with 1 mM CuOOH for 5 h (D), 5  $\mu$ M RSL3 for 6 h (E) or 5  $\mu$ M ML162 for 5 h (F) and WT, *Ripk3*<sup>-/-</sup>/*Casp8*<sup>-/-</sup>, and *Mlkl*<sup>-/-</sup> treated with 1 mM CuOOH for 5 h (G), 5  $\mu$ M RSL3 for 6 h (H), or 5  $\mu$ M ML162 for 5 h (I). Data information: All graphs show the mean  $\pm$  SD. Data are pooled from three independent experiments performed in triplicate (A–I). Statistical analysis was done using Student's unpaired two-sided t-test (A–C) or one-way ANOVA (D–I).

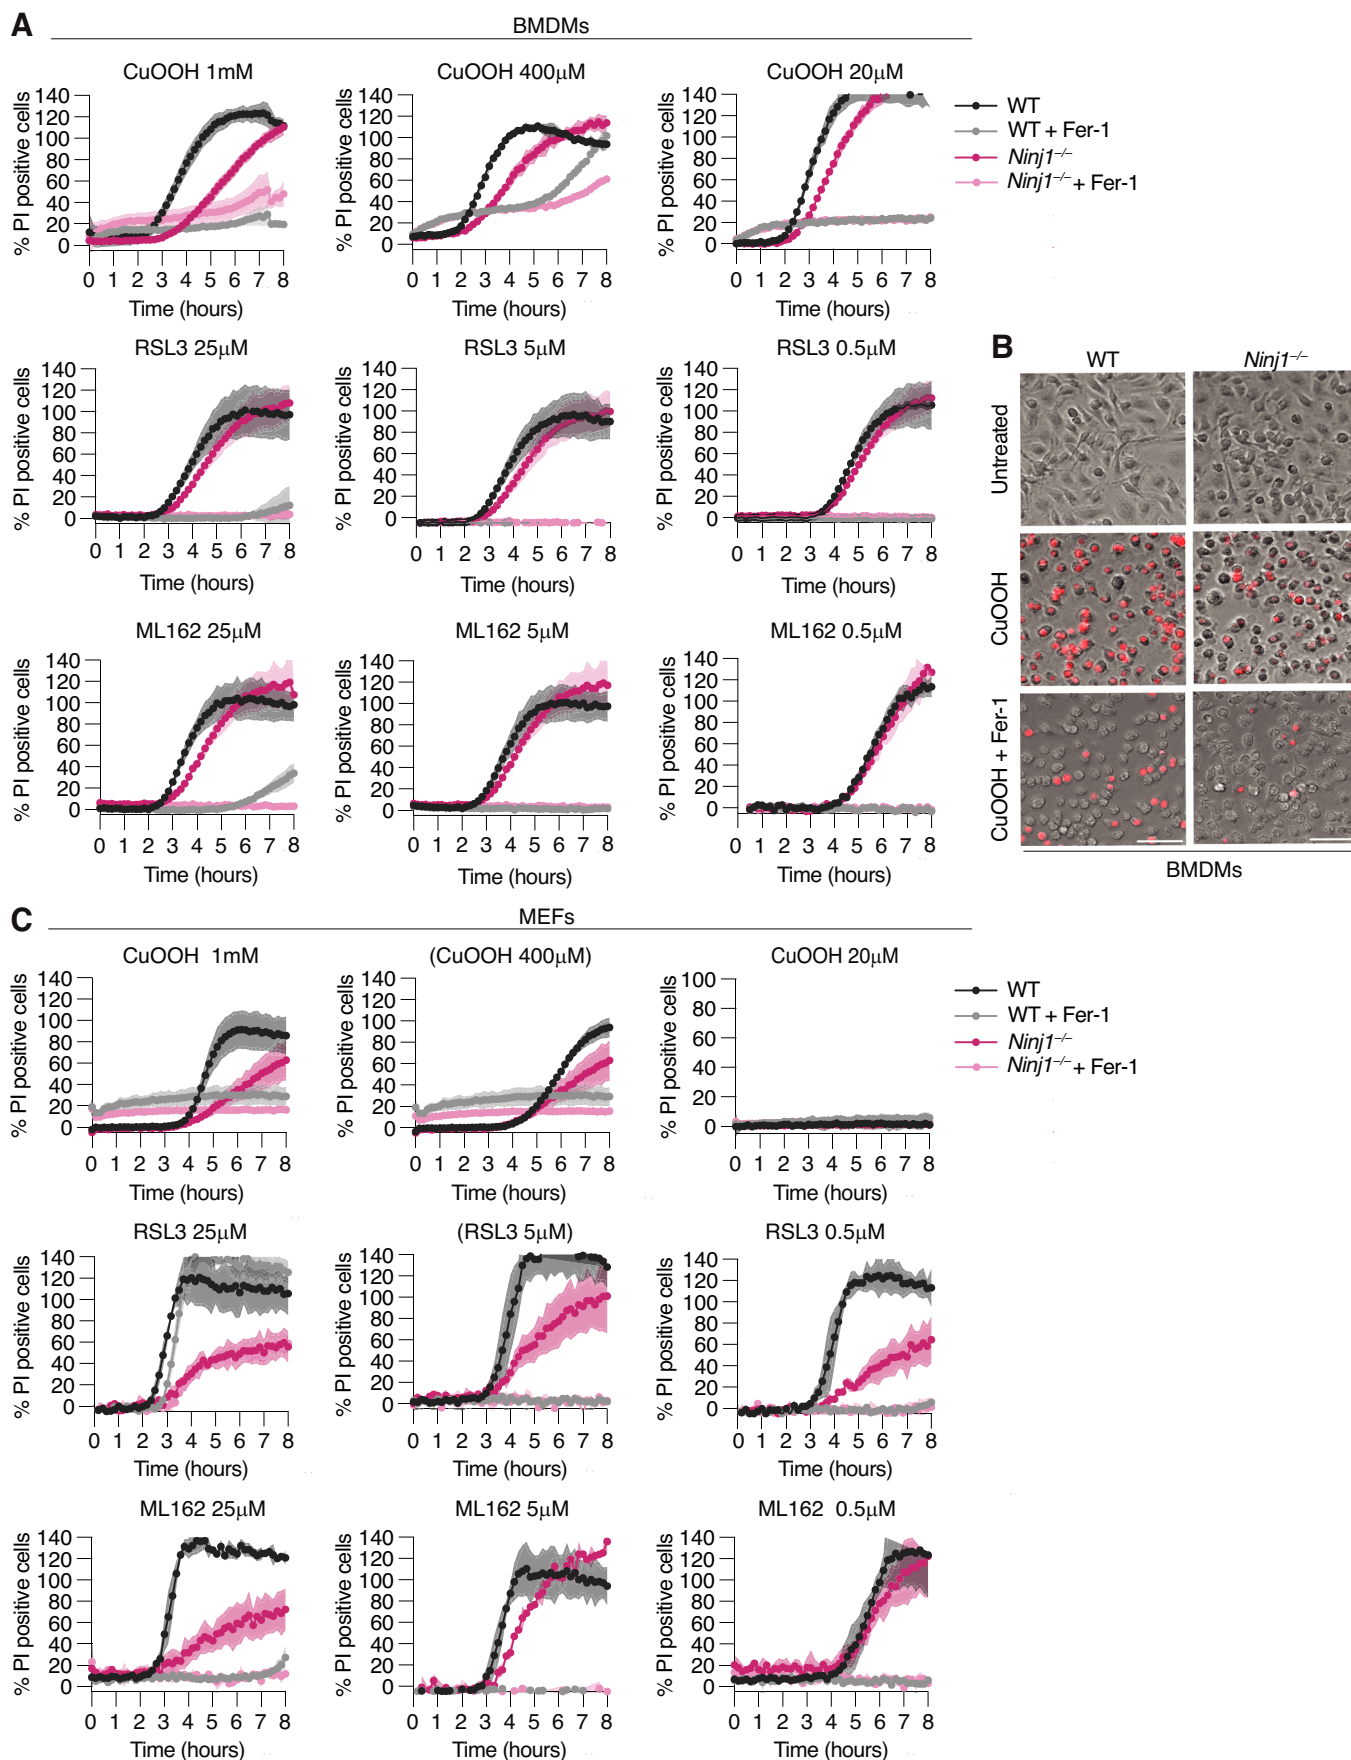

**◀ Figure EV4. NINJ1 controls plasma membrane permeabilization during ferroptosis in macrophages and fibroblasts.**

(A) Percentage of propidium iodide (PI, Mw = 668 Da) uptake in WT and *Ninj1*<sup>-/-</sup> BMDMs over time (0–8 h) after treatment with different concentrations of CuOOH, RSL3, or ML162. (B) Representative images showing PI uptake (red) in WT and *Ninj1*<sup>-/-</sup> BMDMs left untreated or after treatment with 1 mM CuOOH for 5 h. Scale bar: 200 μm. (C) Percentage of propidium iodide (PI, Mw = 668 Da) uptake in WT and *Ninj1*<sup>-/-</sup> MEFs over time (0–8 h) after treatment with different concentrations of CuOOH, RSL3, or ML162. When indicated, 25 μM Fer-1 was added simultaneously with ferroptosis activators (A–C). Data information: All graphs show the mean ± SD. Data are representative of three (A, C) or two (B) independent experiments performed in triplicate.

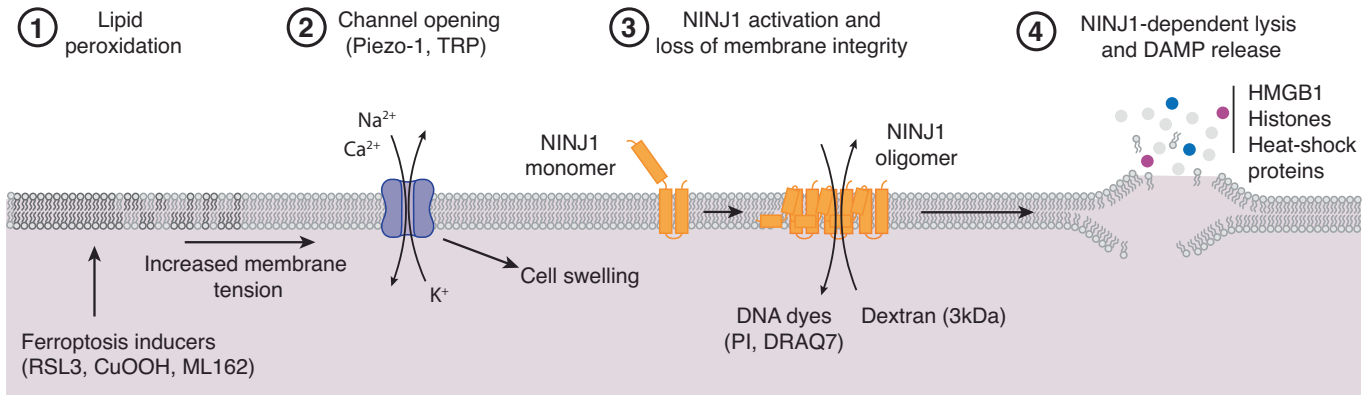

**Figure EV5. Model for ferroptosis-associated cell lysis.**

(1) Ferroptosis inducers promote the formation of lipid peroxides at the plasma membrane which cause and increase in membrane tension. (2) Mechanosensitive ion channels (Piezo-1 and TRP channels) open in response to increased membrane tension, resulting in the entry of calcium and sodium ions and the release of potassium ions. These non-selective ion fluxes cause an increase in the cell volume and swelling. (3) Following this step, NINJ1 is activated, possibly because of ion imbalance, swelling or a yet unrecognized signal, and oligomerizes to form amphipathic filaments. Initially these filaments cause only small lesions that allow the entry and exit of small molecules, such as DNA-binding dyes. (4) Eventually NINJ1 lesions cause complete membrane rupture and cell lysis. As a consequence of NINJ1-dependent PMR, ferroptotic cells start to leak intracellular content among them many DAMPs that can drive inflammation.
